# Supplementary material for: A pressure-induced topological phase with large Berry curvature in Pb1−xSnxTe
Source: PubMed Central journal article supplement — Sci Adv. 2017 May 31;3(5):e1602510. doi: 10.1126/sciadv.1602510 (PMC5451193; doi:10.1126/sciadv.1602510), 2017-05-31
Supplement: 1602510_SM.pdf [file 1602510_SM.pdf]

## Supplementary Materials for A pressure-induced topological phase with large Berry curvature in $\text{Pb}_{1-x}\text{Sn}_x\text{Te}$

Tian Liang, Satya Kushwaha, Jinwoong Kim, Quinn Gibson, Jingjing Lin, Nicholas Kioussis,  
Robert J. Cava, N. Phuan Ong

Published 31 May 2017, *Sci. Adv.* **3**, e1602510 (2017)  
DOI: 10.1126/sciadv.1602510

### This PDF file includes:

- section S1. Ab initio band calculations.
- section S2. Field-induced anomalous Hall effect.
- fig. S1. Calculated  $\mathbf{k}$ -space trajectories of Weyl nodes in  $\text{Pb}_{1-x}\text{Sn}_x\text{Te}$  ( $x = 0.5$ ) under applied pressure in zero magnetic field.
- fig. S2. Phase diagram of the Weyl phase in  $\text{Pb}_{1-x}\text{Sn}_x\text{Te}$  ( $x = 0.25$ ) and orbit parameters.
- fig. S3. Phase diagram of the Weyl phase in  $\text{Pb}_{1-x}\text{Sn}_x\text{Te}$  ( $x = 0.25$ ) in the  $\alpha$ - $\lambda$  plane with applied  $\mathbf{B} \parallel [112]$ .
- fig. S4. X-ray diffractograms of two powdered specimens of  $\text{Pb}_{1-x}\text{Sn}_x\text{Te}$  taken from the crystal boules.
- fig. S5. Supplemental data of  $(\text{Pb}_{0.5}\text{Sn}_{0.5})_{1-y}\text{In}_y\text{Te}$  for samples A1 and A2.
- fig. S6. Supplemental data of  $\text{Pb}_{0.75}\text{Sn}_{0.25}\text{Te}$  for sample E1.
- References (23–33)

## section S1. Ab initio band calculations

We have performed extensive density-functional theory calculations of the electronic structure of  $\text{Pb}_{1-x}\text{Sn}_x\text{Te}$  to investigate how changes to the lattice parameter affect the states in the vicinity of the  $L$  points of the Brillouin zone (BZ) surface (this simulates application of hydrostatic pressure  $P$ ). We assume the existence of a weak sublattice distortion  $\mathbf{d} \parallel [111]$ . At a specific pressure (identified as  $P_1$ ), we find that a pair of Dirac nodes appears near each of the 3 equivalent  $L$  points. As  $P$  is raised above  $P_1$ , each Dirac node splits into a pair of Weyl nodes with opposite chirality. The Weyl nodes move in an elliptical orbit until they mutually annihilate at a higher pressure (identified as  $P_2$ ). We also simulate the effect of time-reversal symmetry breaking on the Weyl pairs by introducing a finite Zeeman field. In general, the calculations agree well with the transport results reported in the main text.

The *ab initio* calculations were carried out within the framework of the projector augmented-wave formalism [23], as implemented in the Vienna *ab initio* simulation package (VASP) [24]. For the total-energy calculations, the PBEsol [25] was employed to treat the exchange-correlation potential. On the other hand, to investigate the band-gap evolution versus  $P$ , we employed the modified Becke-Johnson Local Density Approximation (MBJLDA) functional, which has been shown [26] to yield accurate band gaps, effective masses, and frontier-band ordering. Accurate determination of these parameters are especially important in the topological insulator phase. Spin-orbit coupling was included in the self-consistent calculations.

The energy cut-off of the plane-wave expansion of the basis functions was set at 300 eV and an  $8 \times 8 \times 8$   $k$ -point mesh was used in the Brillouin zone sampling. The calculated equilibrium lattice constants for SnTe and PbTe of 6.288 Å and 6.441 Å, respectively, are in good agreement with the experimental values of 6.303 Å and 6.443 Å [27].

We employ the WANNIER90 package [28] with a frozen energy window of 1 eV above the Fermi level  $E_F$  to construct Wannier functions from the outputs of the first-principles calculations for the SnTe and PbTe pristine materials. In order to determine the electronic structure of the  $\text{Pb}_{1-x}\text{Sn}_x\text{Te}$  alloys we employ the virtual-crystal approximation where each Pb or Sn is replaced by a “virtual” atom whose properties are the weighted average of

the two constituents. Further, for the lattice constant and the relative ferroelectric displacement  $x_P$  sampling mesh, we use a linear interpolation scheme.

Even though the MBJLDA functional gives band gap of 0.24 eV and -0.13 eV for PbTe and SnTe, respectively, in reasonable agreement with the corresponding experimental values of 0.19 eV and -0.20 eV [29], the larger calculated values lead to large values of the predicted critical pressures  $P_1$  and  $P_2$ . Therefore, using scissor operators the on site energies of the Pb and Sn  $p$ -orbitals are adjusted to reproduce the experimental values of the band gap at the theoretical equilibrium lattice for PbTe and SnTe, namely

$$\begin{aligned} \epsilon_{\text{Pb-}p} &\longrightarrow \epsilon_{\text{Pb-}p} - 0.047 \text{ eV} \\ \epsilon_{\text{Sn-}p} &\longrightarrow \epsilon_{\text{Sn-}p} - 0.124 \text{ eV} \end{aligned} \quad (\text{S1})$$

The response of the Weyl nodes to a magnetic field  $\mathbf{B}$  is simulated by including the Zeeman energy. The direction of  $\mathbf{B}$  is determined by the spinor quantization axis in the VASP calculations

$$H_{m,n}^{\text{Zeeman}}(\mathbf{k}) = \lambda \sigma_{\hat{n}} \quad (\text{S2})$$

We investigated the two field directions  $\mathbf{B} \parallel [111]$  and  $\mathbf{B} \parallel [\bar{1}\bar{1}2]$ . The evolution of the Weyl nodes under hydrostatic pressure and/or magnetic field is determined using a steepest descent method.

### A. Emergence of Weyl phase under pressure

In the absence of the ferroelectric displacement, band inversion under pressure occurs at the four equivalent  $L$  points in  $\mathbf{k}$  space. The ferroelectric atomic displacement  $\mathbf{d} \parallel [111]$ , which is observed in SnTe and GeTe, introduces a Rashba splitting that breaks the cubic symmetry, rendering the  $L_0$  point (which lies in the direction  $[111]$ ) inequivalent to the remaining three  $L$  points (in zero  $B$ , these equivalent points are called collectively  $L_1$ ; see fig. S1). At the insulator-to-metal transition (at the lower critical pressure  $P_1$ ), closing of the bulk gap at  $L_1$  coincides with the appearance of two Dirac nodes bracketing each  $L_1$  point. Increasing  $P$  slightly above  $P_1$  further splits each Dirac node into a pair of Weyl nodes of opposite chirality (there are 6 Weyl pairs altogether). When the pressure exceeds  $P_1$ , the two Dirac nodes at  $L_1$  split into four Weyl nodes,  $w_1^\pm$  and  $w_2^\pm$ , where

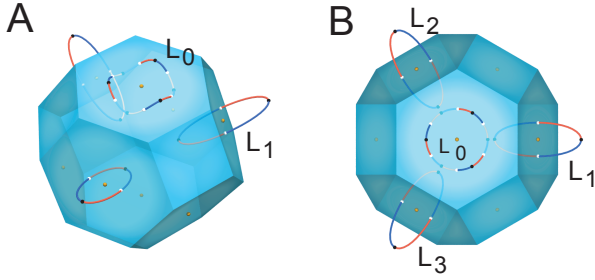

fig. S1. Calculated  $k$ -space trajectories of Weyl nodes in  $\text{Pb}_{1-x}\text{Sn}_x\text{Te}$  ( $x = 0.5$ ) under applied pressure in zero magnetic field. Panel (A) shows the  $L_0$  point and the 3 equivalent  $L_1$  points on the BZ surface in a perspective with  $\mathbf{d} \parallel [111]$  vertical. Panel (B) shows the top-down view sighted along  $\mathbf{d}$ . Trajectories of Weyl nodes with positive (negative) chirality are colored red (blue). White and black dots indicate creation and annihilation points, respectively. The orbits are shown magnified by a factor of 10 relative to the scale of the BZ.

subscripts (1, 2) identify the starting Dirac node and superscripts (+, -) refer to the chirality of the Weyl nodes. In fig. S1, the  $k$ -space trajectories of the nodes with +(-) chirality are colored red (blue). For clarity, the orbits displayed are magnified by a factor of 10 relative to the BZ scale. White and black dots indicate the creation and annihilation points, respectively. As noted, we have 12 Weyl nodes altogether. As  $P$  exceeds  $P_1$ , the nodes  $w_1^+$  and  $w_2^-$  move into the interior of the first BZ, whereas  $w_1^-$  and  $w_2^+$  move away from the interior. When  $P$  reaches the higher critical pressure  $P_2$ , the 12 Weyl nodes annihilate pair-wise simultaneously (in zero  $B$ ) at the points shown as black dots. Near the  $L_0$  point, the Weyl nodes exist over a much narrower interval of  $P$  between  $P_1$  and  $P_2$ . The undulating trajectory of the Weyl nodes near  $L_0$  under pressure (fig. S1) is similar to that reported in ferroelectric hexagonal  $\text{BiTeI}$  [30].

In fig. S2A, we plot the phase diagram in the plane of  $a$  vs.  $x_p$  to identify the Weyl phase in  $\text{Pb}_{1-x}\text{Sn}_x\text{Te}$  ( $x = 0.25$ ). Here,  $x_p = d/d_{[111]}$  is the ferroelectric displacement  $d$  normalized to the unit-cell diagonal  $d_{[111]}$ . The pink wedge represents the region in which the Weyl nodes near the  $L_1$  point are stable. As shown in the upper inset, the bulk gap at  $L_1$  vanishes within the interval of lattice constants ( $a = 6.292 \rightarrow 6.308 \text{ \AA}$ ) with  $x_p$  fixed at 0.008. The wedge separates the topological crystalline insulator phase (TCI) from the normal insulator (NI) phase. When the ferroelectric displacement vanishes ( $x_p \rightarrow 0$ ), the rapid shrinking of the wedge implies the merging of the two Dirac cones at all the  $L$  points. This illustrates Murakami's prediction[1,2] that

breaking of inversion symmetry is necessary to observe the emergence of the Weyl phase when the bulk gap is forced to close.

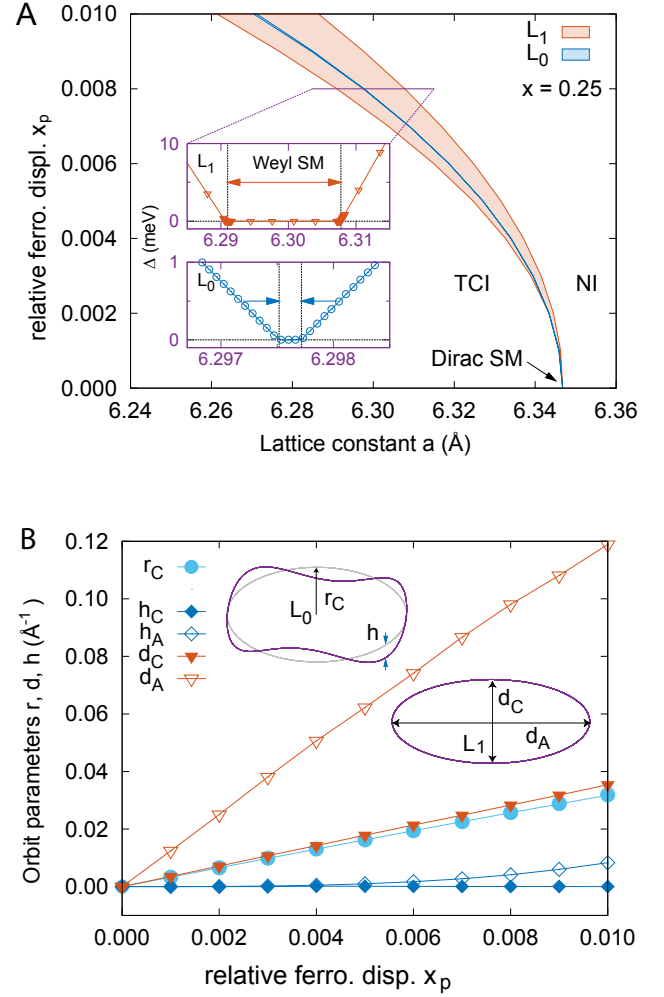

fig. S2. The phase diagram of the Weyl phase in  $\text{Pb}_{1-x}\text{Sn}_x\text{Te}$  ( $x = 0.25$ ) and orbit parameters. Panel (A): The phase diagram of the Weyl phase in  $\text{Pb}_{1-x}\text{Sn}_x\text{Te}$  ( $x = 0.25$ ) in the plane of  $a$  vs.  $x_p$  where  $a$  is the lattice constant and  $x_p$  the relative ferroelectric displacement ( $x_p \equiv d/d_{[111]}$  with  $d_{[111]}$  the unit-cell diagonal along  $[111]$ ). The pink wedge is where the 12 Weyl nodes near the points  $L_1$ ,  $L_2$  and  $L_3$  are stable. The narrow blue strip indicates where the Weyl nodes exist around the  $L_0$  point. The wedge separates the topological crystalline insulator (TCI) and normal insulator (NI) phases. The upper inset shows how the bulk gap  $\Delta$  at  $L_1$  vanishes within the lattice interval  $a = (6.292, 6.308) \text{ \AA}$ , with  $x_p$  fixed at 0.008. The lower inset shows the bulk gap at  $L_0$  closing within a much narrower interval of  $a$ . Panel (B) plots the increase versus  $x_p$  of  $r_C$  (the radius of the circular orbit of the Weyl nodes around  $L_0$ ), and  $d_A$  and  $d_C$  (the major and minor diameters of the elliptical orbit around  $L_1$  as sketched in the insets). Subscripts A and C refer to annihilation and creation. Also plotted is the undulation amplitude  $h$  of the orbit at  $L_0$ .

For the Sn content  $x = 0.25$ , we find that Weyl nodes

appear at the  $L_0$  point in a very narrow range of  $P$  (blue strip). Accordingly, the bulk gap at  $L_0$  closes only over a much narrower interval (at the same  $x_p$ ), as shown in the lower inset in fig. S2A.

The  $\mathbf{k}$ -space orbits described by the Weyl nodes can be characterized by their radii or diameters (insets in fig. S2B). At the point  $L_0$ , the projection of the orbit onto the (111) BZ surface is circular with radius  $r_C = r_A$  (subscripts C and A refer to creation and annihilation points). As shown in fig. S1A, the orbit at  $L_0$  undulates above and below this surface with an amplitude  $h$ . By contrast, the orbits at  $L_1$  are elliptical with major and minor diameters  $d_A$  and  $d_C$ , respectively. In the main panel of fig. S2B, we plot the monotonic increase of  $r_C$ ,  $d_A$ ,  $d_C$  and  $h_A$  as  $x_p$  increases. Interestingly,  $r_C$  and  $d_C$  are closely matched throughout the range of  $x_p$  explored.

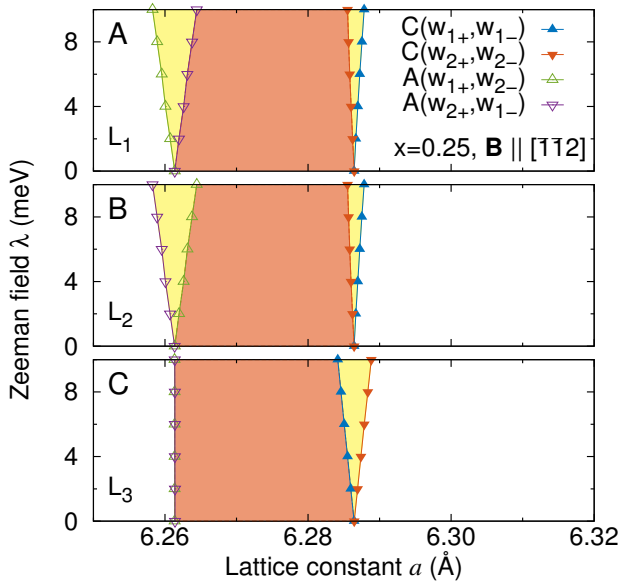

fig. S3. Phase diagram of the Weyl phase in  $\text{Pb}_{1-x}\text{Sn}_x\text{Te}$  ( $x = 0.25$ ) in the  $a$ - $\lambda$  plane with applied  $\mathbf{B} \parallel [112]$ . Breaking of the  $C_3$  symmetry about the  $[111]$  axis by  $\mathbf{B}$  makes  $L_3$  inequivalent to  $L_1$  and  $L_2$  ( $L_3$  lies in the plane spanned by  $\mathbf{B}$  and  $[111]$ ).  $x_p = 0.01$  is used. In Panel (A), a finite Zeeman field  $\lambda$  splits the phase boundary for creation of Weyl nodes into two distinct boundaries (V-shaped wedge on the right). The annihilation boundaries (left) are similarly split. Panels (B) and (C) show the splitting for the nodes near  $L_2$  and  $L_3$ , respectively. In each panel, the areas shaded orange (yellow) have four (two) Weyl nodes near each of the points  $L_1$ ,  $L_2$  and  $L_3$ .

## B. Effect of Magnetic Field on the Weyl Nodes

Our calculations reveal that the Weyl node positions are highly sensitive to the time-reversal symmetry break-

ing effects of  $\mathbf{B}$ . The effects, expressed through the Zeeman energy coupling to the spins, are sensitive to the direction of  $\mathbf{B}$  (in finite  $B$ , we restore the labels of  $L_1$ ,  $L_2$  and  $L_3$ ).

For  $\mathbf{B} \parallel [111]$ , one of the two Dirac nodes appears near  $L_1$  at a critical pressure lower than in the case with  $B = 0$  (correspondingly, its partner appears at a higher pressure). Hence the pair of nodes  $w_1^\pm$  appears at a lower pressure than the pair  $w_2^\pm$ . The annihilation boundary is not affected if  $\mathbf{B}$  is aligned  $\parallel [111]$ .

By contrast, if  $\mathbf{B}$  is rotated to the perpendicular direction  $[112]$ , the  $C_3$  symmetry about the  $[111]$  axis is broken, which makes  $L_3$  inequivalent to  $L_1$  and  $L_2$  ( $L_3$  lies in the plane spanned by  $[111]$  and  $\mathbf{B}$ ). As shown in the phase diagram in fig. S3, this leads to field-induced splittings of the phase boundaries on both sides of the Weyl phase for the nodes  $L_1$  and  $L_2$ . In fig. S3A, the phase boundary on the right (larger  $a$ ) representing Weyl node creation at  $L_1$  splits into 2 lines as  $\lambda$  increases. At the boundary on the left, a finite  $\lambda$  now also affects annihilation of the Weyl nodes. The nodes  $w_1^+$  and  $w_2^+$  (outside the BZ volume) mutually annihilate at a pressure lower than the nodes  $w_1^-$  and  $w_2^-$  which lie inside the BZ. As a result, the phase boundary for annihilation splits into two lines. The effects on the phase boundaries at  $L_2$  are similar, except that the Weyl nodes are swapped on the annihilation curves. The annihilation boundary for  $L_3$  in Panel (C) remains unsplit (annihilation of the two Weyl pairs is simultaneous).

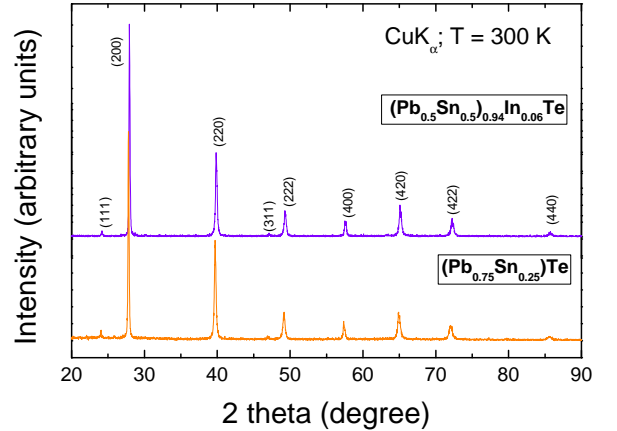

fig. S4. X-ray diffractograms of two powdered specimens of  $\text{Pb}_{1-x}\text{Sn}_x\text{Te}$  taken from the crystal boules. The upper trace is for a boule with composition  $(\text{Pb}_{0.5}\text{Sn}_{0.5})_{1-y}\text{In}_y\text{Te}$ , with  $x = 0.5$  and  $y = 0.06$ . The lower trace is for a sample with composition  $\text{Pb}_{0.75}\text{Sn}_{0.25}\text{Te}$  with  $x = 0.25$ .

To relate to the experiment, we note that fig. S3 predicts that if  $P$  is fixed either just below  $P_1$  or just above  $P_2$  in zero  $B$ , the sample crosses an insulator-to-metal boundary into the Weyl phase as  $B$  increases. At

5 K, this results in a very large decrease in the observed resistivity. This explains the anomalously large negative MR observed in the experiment. However, a realistic comparison with the experiment requires incorporation of the strong anisotropy of the effective  $g$ -factor [31,32]. Here we assumed an isotropic  $g$ -factor.

## section S2. Field-induced anomalous hall effect

### A. $\text{Pb}_{0.5}\text{Sn}_{0.5}\text{Te}$

The x-ray diffractograms recorded for two powdered specimens of two typical samples are shown in fig. S4. The grown crystals are single-phased. The diffraction peaks are in very close agreement with the rocksalt crystal structure of space group  $Fm\bar{3}m$ .

We focus on the topological metallic phase (regime II). As shown in Fig. 2D of the main text, the two Dirac nodes split at  $P = P_1$  into two Weyl pairs at the three points  $L_1$ ,  $L_2$  and  $L_3$ . The size of the Fermi pockets grows under pressure, as evidenced by the evolution of SdH oscillations and the Hall density under pressure. As discussed in the main text, the system acquires an anomalous Hall contribution in finite  $B$ .

We first convert the measured resistivity tensor  $\rho_{ij}$  into the conductivity tensor  $\sigma_{ij}$  at each value of  $B$ . Additivity of the Hall conductivities gives  $\sigma_{xy} = \sigma_{xy}^N + \sigma_{xy}^A$ . Assuming that the normal term  $\sigma_{xy}^N$  is given by the conventional Drude expression, we have used the following expressions to fit the total observed Hall conductivity

$$\sigma_{xy} = \sigma_{xy}^N + \sigma_{xy}^A \quad (\text{S3})$$

$$\sigma_{xy}^A = \sigma_{\text{AHE}}^0 g(x) \quad (\text{S4})$$

$$g(x) = \frac{1}{[e^{-x} + 1]} \quad x = \frac{(B - B_A)}{\Delta B} \quad (\text{S5})$$

$$\sigma_{xy}^N = n_H e \mu \frac{\mu B}{1 + (\mu B)^2} \quad (\text{S6})$$

where  $\sigma_{xy}^A$  and  $\sigma_{xy}^N$  are the anomalous and Drude Hall conductivities, respectively, and  $n_H$  is the carrier density. Here, the onset of the anomalous Hall effect (AHE) around  $B_A$  was simulated numerically by a smooth step-function  $g(x)$  with  $\Delta B$  representing the width of the step, i.e.,  $x = (B - B_A)/\Delta B$ .

We found that Eqs. S3 to S6 provide an excellent fit to the total (observed)  $\sigma_{xy}$ . To highlight the anomalous contribution, we plot in fig. S5D the measured  $\sigma_{xy}$  (solid curves) at the 3 pressures 16.5, 18.3 and 21.8 kbar. For comparison, we have also plotted the ordinary term  $\sigma_{xy}^N$  (dashed curves) given by the Drude expression Eq. S6. At each  $P$ , the difference of the 2 curves is then the anomalous term  $\sigma_{xy}^A$  (simulated by  $f(x)$ ). For the curve at 21.8 kbar,  $\sigma_{xy}^A$  is the area shaded in pink.

An interesting feature inferred is that the AHE term fits the broadened step-function form  $f(x)$  much better

than say a  $B$ -linear form. The onset field  $B_A$  is close to the field at which the lowest Landau level (LL) is entered. This occurs close to the knee feature in the field profiles of  $\rho_{yx}$  (Fig. 3A of main text and fig. S5C here). Further, we note that the field profile of the effective Hall number  $\rho_{yx}/eB$  displays a pronounced increase above  $B_A$  (Fig. 2C of the main text and fig. S5B here). The results imply that the anomalous Hall response sharply increases when  $E_F$  drops into the lowest ( $n = 0$ ) LL. This could be closely related to the chiral nature of the  $n = 0$  LL, although there are no theoretical predictions specific to the Hall effect in the chiral LL.

From the fits, the strength of the AHE term  $\sigma_{\text{AHE}}^0$  can be determined. To show its behavior versus  $P$ , we have plotted it normalized to the hole density  $p$  as  $\sigma_{\text{AHE}}^0/p$  vs.  $P$  in Fig. 3C of the main text (this yields the Berry curvature averaged over the FS). The corresponding results for  $\text{Pb}_{0.75}\text{Sn}_{0.25}\text{Te}$  are shown here in fig. S6B.

A finite Berry curvature leads to an anomalous velocity  $\mathbf{v}_A = \mathbf{E} \times \boldsymbol{\Omega}(\mathbf{k})$ , which engenders the anomalous Hall conductivity [33]

$$\sigma_{xy}^A = \sum_{i,\mathbf{k}} n_i(\mathbf{k}) \Omega_{z,i}(\mathbf{k}) \quad (\text{S7})$$

where the index  $i$  runs over the Weyl nodes, and  $n_i$  is the occupation number in node  $i$ . Depending on the chirality  $\chi_i$ ,  $\boldsymbol{\Omega}_i(\mathbf{k})$  is directed either radially inwards or outwards. Close to the node at  $\mathbf{K}_i$ , the curvature has the monopole form  $\boldsymbol{\Omega}_i(\mathbf{k}) = \chi_i \Delta \mathbf{k}_i / |\Delta \mathbf{k}_i|^3$ , where  $\Delta \mathbf{k}_i = \mathbf{k} - \mathbf{K}_i$  [33]. When TRS prevails (in zero  $B$ ), the sum over Weyl nodes vanishes. In finite field, the Zeeman field  $\lambda$  shifts the Fermi energy (measured from the node) in opposite directions for different signs in  $\chi_i$ . Because this directly affects  $\Delta \mathbf{k}_i$ , the sum in Eq. S7 yields a finite  $\sigma_{xy}^A$  that grows with  $\lambda$ .

### B. $\text{Pb}_{0.75}\text{Sn}_{0.25}\text{Te}$

Next, we briefly discuss the AHE of  $\text{Pb}_{0.75}\text{Sn}_{0.25}\text{Te}$ . In the topological metallic phase (regime II), as shown in Panels A, C of fig. S6, the MR and Hall are essentially the same as those of  $\text{Pb}_{0.5}\text{Sn}_{0.5}\text{Te}$  in regime II except that now everything is confined in a narrower range of magnetic field. Therefore, the same analyses used in previous section can be employed to yield the parameters such as anomalous Hall strength  $\sigma_{\text{AHE}}^0$  etc. The results are  $\sigma_{\text{AHE}}^0 \sim 25 \Omega^{-1} \text{cm}^{-1}$  at  $p = 18$  kbar. Unlike  $\text{Pb}_{0.5}\text{Sn}_{0.5}\text{Te}$ , in  $\text{Pb}_{0.75}\text{Sn}_{0.25}\text{Te}$ , high- $P$  insulating phase (regime III) can be achieved under experimentally accessible pressure above  $\sim 25$  kbar, signaled by the divergence of  $\sigma_{\text{AHE}}^0/p$  shown in Panel B of fig. S6.

The carrier density in  $\text{Pb}_{0.75}\text{Sn}_{0.25}\text{Te}$  (Sample E1) at  $P = 21.7$  kbar is 16.7 times smaller than that of  $\text{Pb}_{0.5}\text{Sn}_{0.5}\text{Te}$  (Sample A2) at  $P = 25.4$  kbar, and yet in both  $\text{Pb}_{0.5}\text{Sn}_{0.5}\text{Te}$  and  $\text{Pb}_{0.75}\text{Sn}_{0.25}\text{Te}$ , the maximum values of the conductivities  $\sigma$  are nearly the same at  $B = 0$

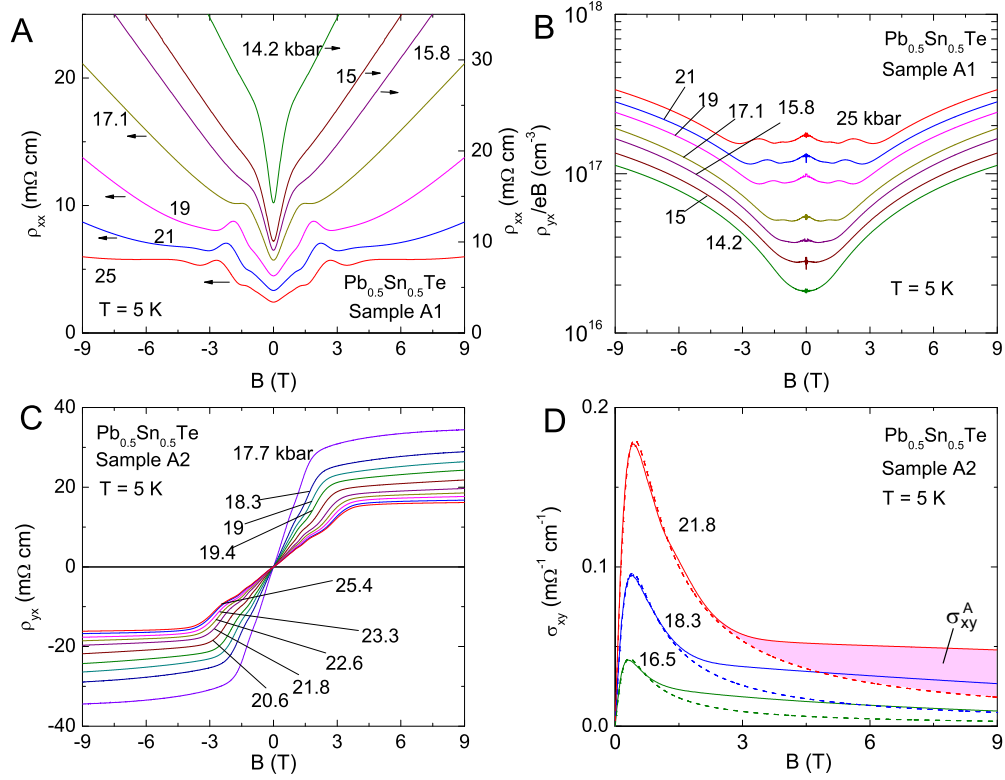

fig. S5. Supplemental data of  $(\text{Pb}_{0.5}\text{Sn}_{0.5})_{1-y}\text{In}_y\text{Te}$  for samples A1 and A2.

Supplemental data of  $(\text{Pb}_{0.5}\text{Sn}_{0.5})_{1-y}\text{In}_y\text{Te}$ , with  $y = 0.06$  taken in Samples A1 (Panels A, B) and A2 (Panels C, D). Panel (A) shows the resistivity  $\rho_{xx}$  versus a transverse  $B$  measured at 5 K and with  $P$  fixed at values 14.2 to 25 kbar for Sample A1. At each  $P$ , the oscillations below  $\sim 3$  T correspond to SdH oscillations (the largest peak corresponds to the  $n = 1$  LL). Panel (B) plots the Hall resistivity divided by  $Be$ ,  $\rho_{yx}/Be$ , vs.  $B$  for Sample A1. At low fields (where SdH oscillations occur), the flat profile allows  $\rho_{yx}/Be$  to be identified with the total hole density  $n_H$ . The strong increase of  $\rho_{yx}/Be$  above 3 T reflects the onset of the AHE term. Panel (C) plots the observed curves of  $\rho_{yx}$  vs.  $B$  at 5 K for Sample A2 with  $P$  fixed at values above  $P_1$ . Instead of the conventional  $B$ -linear profile,  $\rho_{yx}$  bends over at the “knee” near 2-3 T. The unusual Hall profile suggests the appearance of an anomalous Hall conductivity that adds to the ordinary term when  $B$  exceeds the knee value. Panel (D) plots  $\sigma_{xy}$  vs  $B$  (derived from inverting  $\rho_{ij}$ ) at 3 values of  $P$  (solid curves). By fitting to Eqs. S3-S6, we have separated the conventional Hall term  $\sigma_{xy}^N$  (dashed curves) from the AHE term  $\sigma_{xy}^A$ . The latter (shown shaded in pink for the curve at 21.8 kbar) onsets as the broadened step-function  $f(x)$  at  $B_A$ .

( $\sim 0.7$  (m $\Omega$ ) $^{-1}$  cm $^{-1}$ ). This is because the mobility for  $\text{Pb}_{0.75}\text{Sn}_{0.25}\text{Te}$  ( $\sim 5 \pm 1 \times 10^5$  cm $^2$  V $^{-1}$  s $^{-1}$ ) is much larger than that of  $\text{Pb}_{0.5}\text{Sn}_{0.5}\text{Te}$  ( $\sim 2.86 \times 10^4$  cm $^2$  V $^{-1}$  s $^{-1}$ ),

allowing the system to show SdH oscillations at very low fields below  $\sim 1$  T as shown in Panel A of fig. S6, corresponding to  $k_F \sim 0.005$   $\text{\AA}^{-1}$ .

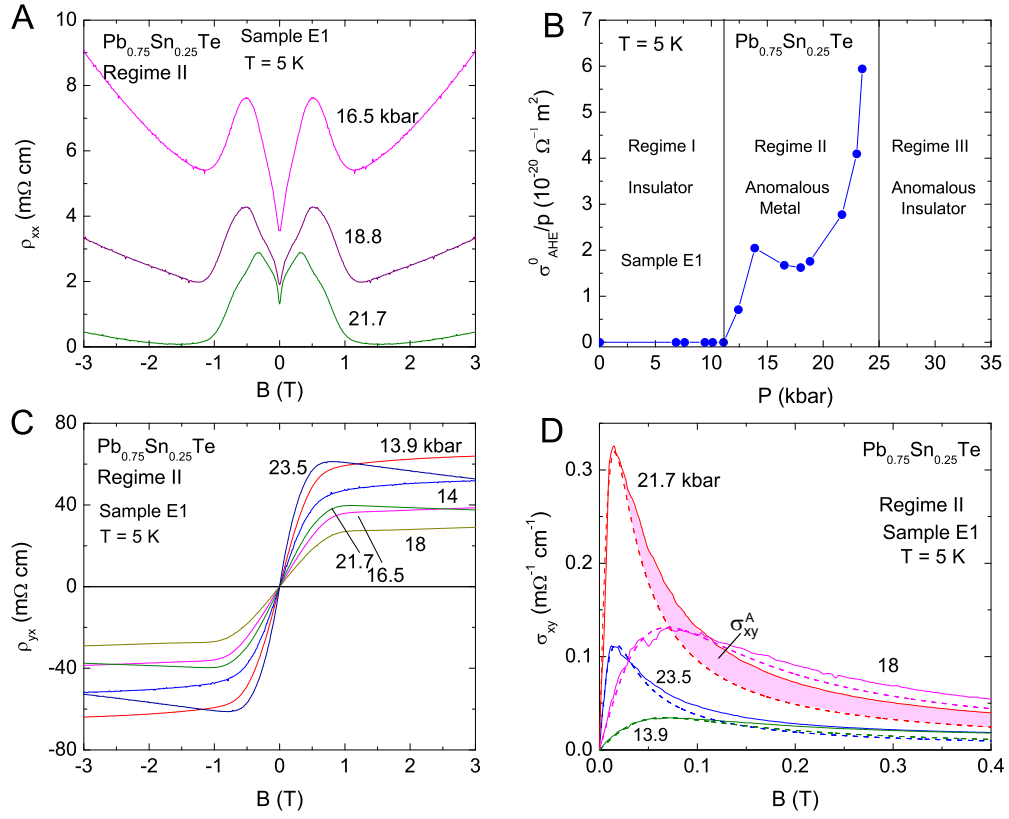

fig. S6. Supplemental data of  $\text{Pb}_{0.75}\text{Sn}_{0.25}\text{Te}$  for sample E1. Panel (A) shows the resistivity  $\rho_{xx}$  versus a transverse  $\mathbf{B}$  measured at 5 K, with  $P$  fixed at 16.5 kbar, 18.8 kbar, and 21.7 kbar (Regime II). At each  $P$ , the oscillations below  $\sim 1$  T correspond to SdH oscillations (the largest peak corresponds to the  $n = 1$  LL). Panel (B) plots the ratio of  $\sigma_{\text{AHE}}^A/n_H$  vs.  $P$ . The ratio, proportional to  $\langle \Omega_z \rangle$ , shows a sharp increase at  $P_1 \sim 11$  kbar followed by a gentler variation in the metallic phase. As  $P$  approaches  $P_2 \sim 25$  kbar,  $\sigma_{\text{AHE}}^A/n_H$  starts to diverge, signaling the appearance of the high- $P$  insulating phase. Panel (C) plots the observed curves of  $\rho_{yx}$  vs.  $B$  at 5 K with  $P$  fixed at values between  $P_1$  and  $P_2$  (Regime II). Instead of the conventional  $B$ -linear profile,  $\rho_{yx}$  bends over above  $\sim 1$  T, suggestive of an extraordinary contribution to  $\sigma_{xy}$  at large  $B$ . The Hall density  $n_H$  reaches its maximum value  $\sim 1.58 \times 10^{16} \text{ cm}^{-3}$  at  $P = 18$  kbar. Panel (D) plots  $\sigma_{xy}$  vs  $B$  (derived from inverting  $\rho_{ij}$ ) at 4 values of  $P$  (solid curves). By fitting to Eqs. S3-S6, we have separated the conventional Hall term  $\sigma_{xy}^N$  (dashed curves) from the AHE term  $\sigma_{xy}^A$ . The latter (shown shaded in pink for the curve at 21.7 kbar) onsets as the broadened step-function  $f(x)$  at  $B_A$ .
